# Supplementary material for: A New Pipeline for the Normalization and Pooling of Metabolomics Data
Source: MDPI journal article supplement (doi:10.3390/metabo11090631), 2021-09-17
Supplement: s1 [file s1]

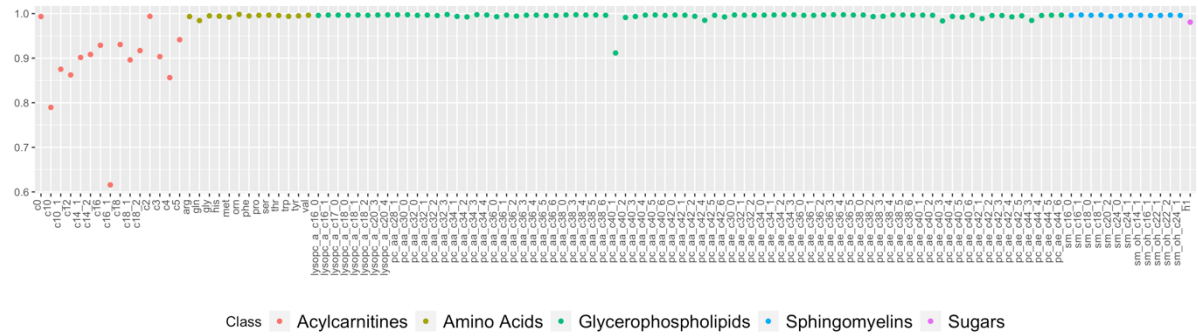

**Supplementary Figure S1.** Correlations between normalized measurements produced by ComBat and our approach. Both approaches were run to correct for batch and study effects, and to preserve biological variations due to study center, gender, alcohol intake and body mass index. The *y*-axis represents the correlation level, and the *x*-axis the 117 metabolites.

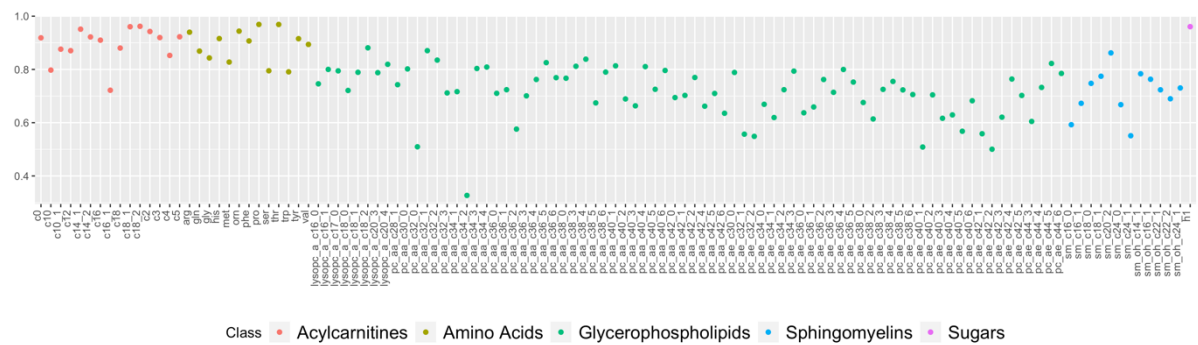

**Supplementary Figure S2.** Correlations between normalized measurements produced by the PCA-based method and our approach. Our approach was run to correct for batch and study effects, and to preserve biological variations due to study center, gender, alcohol intake and body mass index. The *y*-axis represents the correlation level, and the *x*-axis the 117 metabolites.

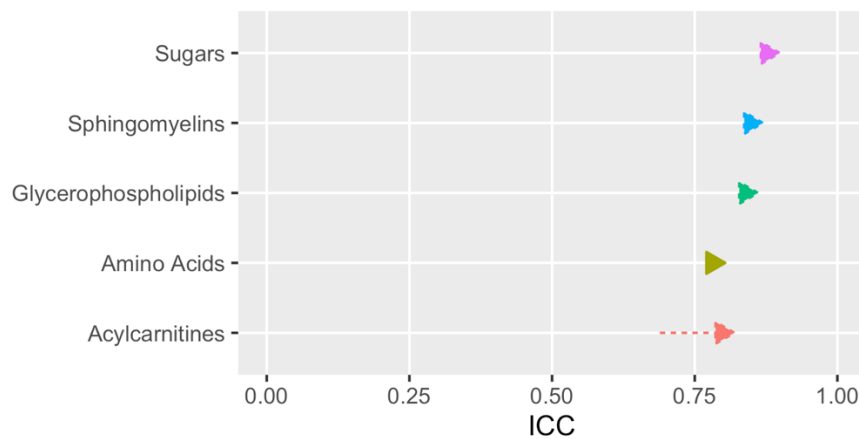

**Supplementary Figure S3.** Average ICC values (*x*-axis) for each class of metabolites (*y*-axis) after normalization using ComBat and our approach; for each arrow, its origin represents the ICC obtained when using ComBat and its peak represents the ICC obtained when using our approach. All arrows are oriented towards the right, especially for acylcarnitines, indicating that our approach produced more reproducible measurements for most metabolites.

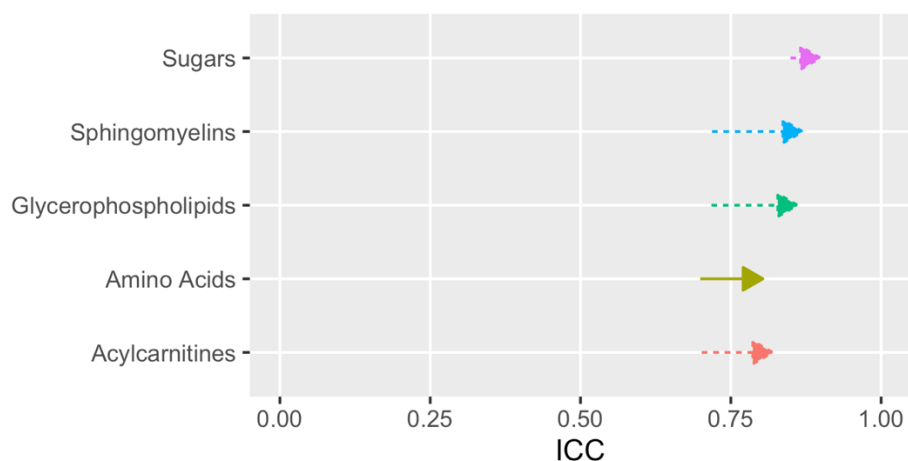

**Supplementary Figure S4.** Average ICC values ( $x$ -axis) for each class of metabolites ( $y$ -axis) after normalization using the PCA-based method and our approach; for each arrow, its origin represents the ICC obtained when using the PCA-based method and its peak represents the ICC obtained when using our approach. All arrows are oriented towards the right, indicating that our approach produced more reproducible measurements for most metabolites.

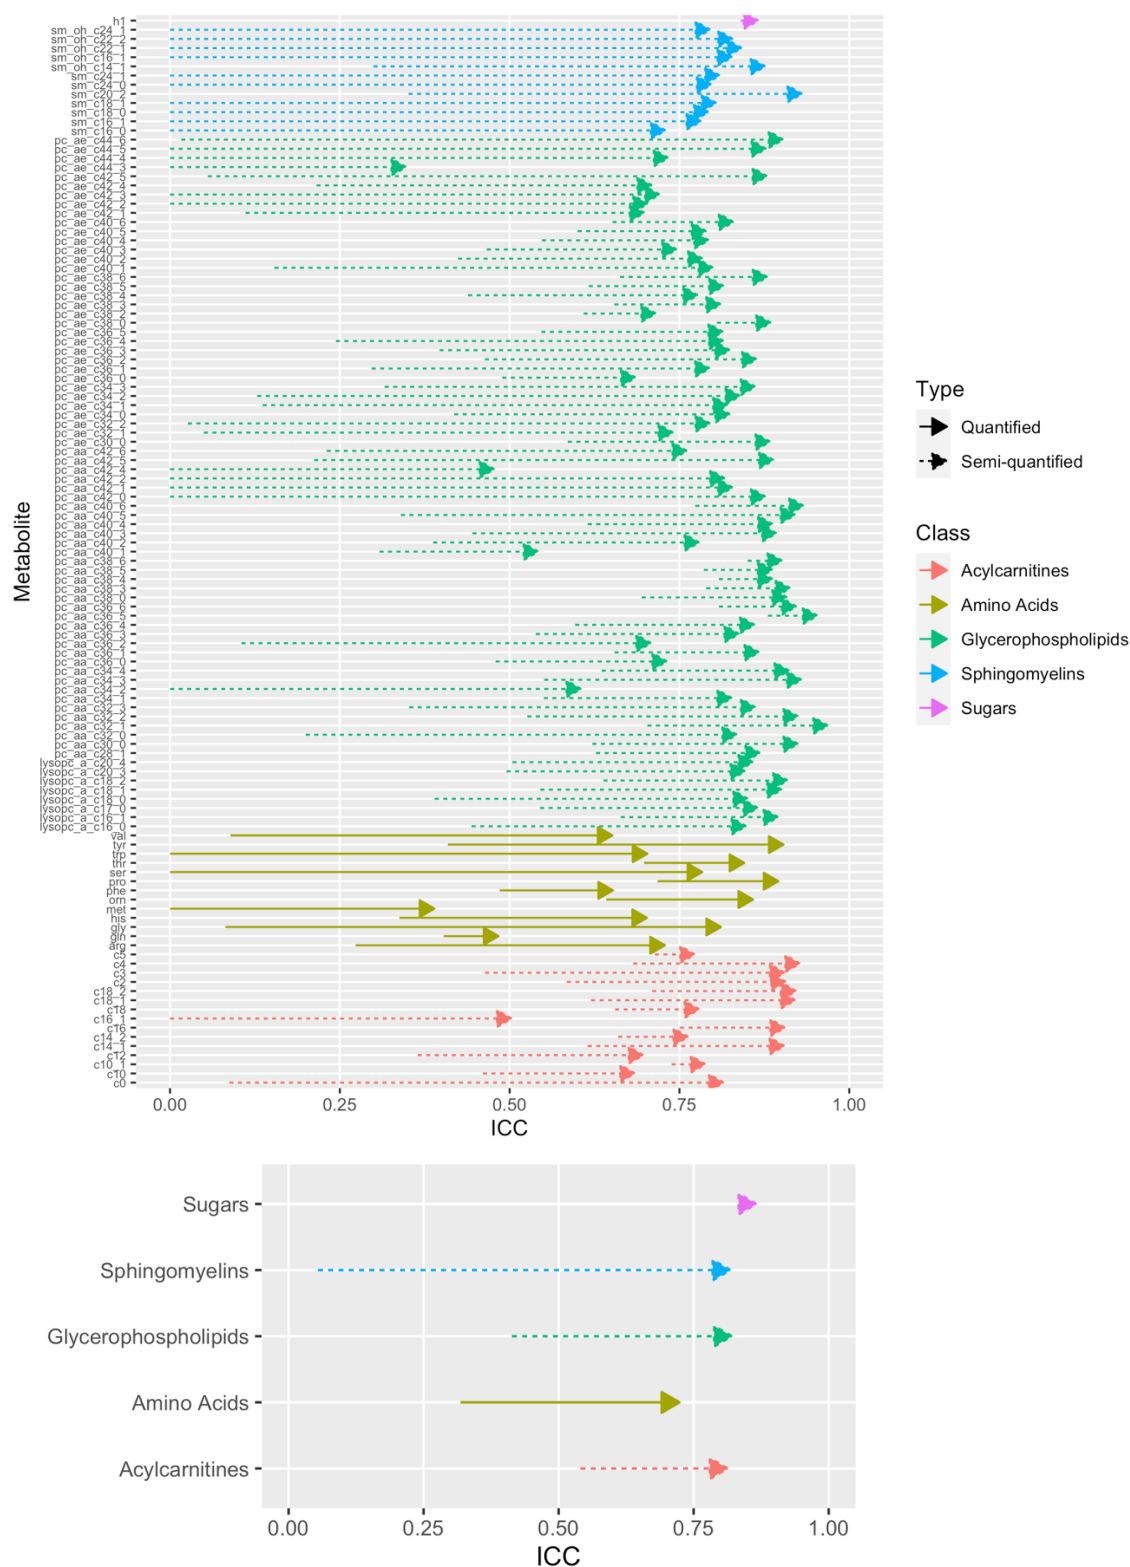

**Supplementary Figure S5.** Metabolite-specific ICC values before and after normalization (top) and average ICC values for each class of metabolites before and after normalization (bottom); normalization was conducted so as to remove study and batch effects while preserving variation due to study center, BMI, gender and alcohol intake. Only duplicate samples measured in two different studies and originating from two different blood matrices (serum and citrate plasma) were used here. For each arrow, its origin represents the ICC value before normalization, and its peak represents the ICC value after normalization. In each plot, the  $x$ -axis represents the ICC value, and the  $y$ -axis each particular metabolite (top) or class of metabolites (bottom).

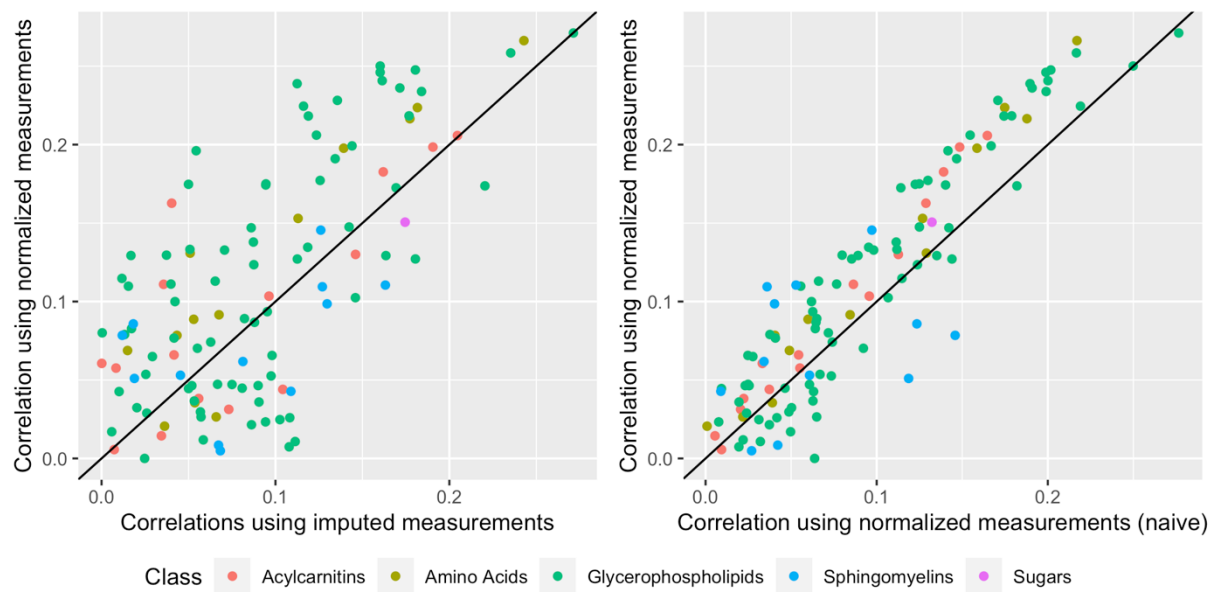

**Supplementary Figure S6.** Correlations (absolute values) between BMI and the 117 metabolites in control samples. The *y*-axis represents values computed with normalized measurements (the normalization was run so as to remove study, batch and center effects while preserving variation due to BMI, gender and alcohol intake), while the *x*-axis represents values computed with imputed (non-normalized) measurements (left), and normalized measurements produced by the “naïve” normalization (right), which corrects for study, batch and center effects without preserving variation due to BMI, gender and alcohol intake.

**Supplementary Table S1.** List of the 117 metabolites retained after the data cleaning step.

| Name                     | Symbol in Figures | Class                |
|--------------------------|-------------------|----------------------|
| Carnitine                | c0                | Acylcarnitins        |
| Acetylcarnitine          | c2                | Acylcarnitins        |
| Propionylcarnitine       | c3                | Acylcarnitins        |
| Butyrylcarnitine         | c4                | Acylcarnitins        |
| Valerylcarnitine         | c5                | Acylcarnitins        |
| Decanoylcarnitine        | c10               | Acylcarnitins        |
| Decenoylcarnitine        | c10_1             | Acylcarnitins        |
| Dodecanoylcarnitine      | c12               | Acylcarnitins        |
| Tetradecenoylcarnitine   | c14_1             | Acylcarnitins        |
| Tetradecadienylcarnitine | c14_2             | Acylcarnitins        |
| Hexadecanoylcarnitine    | c16               | Acylcarnitins        |
| Hexadecenoylcarnitine    | c16_1             | Acylcarnitins        |
| Octadecanoylcarnitine    | c18               | Acylcarnitins        |
| Octadecenoylcarnitine    | c18_1             | Acylcarnitins        |
| Octadecadienylcarnitine  | c18_2             | Acylcarnitins        |
| Arginine                 | arg               | Amino Acids          |
| Glutamine                | gln               | Amino Acids          |
| Glycine                  | gly               | Amino Acids          |
| Histidine                | his               | Amino Acids          |
| Methionine               | met               | Amino Acids          |
| Ornithine                | orn               | Amino Acids          |
| Phenylalanine            | phe               | Amino Acids          |
| Proline                  | pro               | Amino Acids          |
| Serine                   | ser               | Amino Acids          |
| Threonine                | thr               | Amino Acids          |
| Tryptophan               | trp               | Amino Acids          |
| Tyrosine                 | tyr               | Amino Acids          |
| Valine                   | val               | Amino Acids          |
| lysoPC a C16:0           | lysopc_a_c16_0    | Glycerophospholipids |
| lysoPC a C16:1           | lysopc_a_c16_1    | Glycerophospholipids |
| lysoPC a C17:0           | lysopc_a_c17_0    | Glycerophospholipids |
| lysoPC a C18:0           | lysopc_a_c18_0    | Glycerophospholipids |
| lysoPC a C18:1           | lysopc_a_c18_1    | Glycerophospholipids |
| lysoPC a C18:2           | lysopc_a_c18_2    | Glycerophospholipids |
| lysoPC a C20:3           | lysopc_a_c20_3    | Glycerophospholipids |
| lysoPC a C20:4           | lysopc_a_c20_4    | Glycerophospholipids |
| PC aa C28:1              | pc_aa_c28_1       | Glycerophospholipids |
| PC aa C30:0              | pc_aa_c30_0       | Glycerophospholipids |
| PC aa C32:0              | pc_aa_c32_0       | Glycerophospholipids |

**Supplementary Table S1 (continued)**

| Name        | Symbol in Figures | Class                |
|-------------|-------------------|----------------------|
| PC aa C32:1 | pc_aa_c32_1       | Glycerophospholipids |
| PC aa C32:3 | pc_aa_c32_3       | Glycerophospholipids |
| PC aa C34:1 | pc_aa_c34_1       | Glycerophospholipids |
| PC aa C34:2 | pc_aa_c34_2       | Glycerophospholipids |
| PC aa C34:3 | pc_aa_c34_3       | Glycerophospholipids |
| PC aa C34:4 | pc_aa_c34_4       | Glycerophospholipids |
| PC aa C36:0 | pc_aa_c36_0       | Glycerophospholipids |
| PC aa C36:1 | pc_aa_c36_1       | Glycerophospholipids |
| PC aa C36:2 | pc_aa_c36_2       | Glycerophospholipids |
| PC aa C36:3 | pc_aa_c36_3       | Glycerophospholipids |
| PC aa C36:4 | pc_aa_c36_4       | Glycerophospholipids |
| PC aa C36:5 | pc_aa_c36_5       | Glycerophospholipids |
| PC aa C36:6 | pc_aa_c36_6       | Glycerophospholipids |
| PC aa C38:0 | pc_aa_c38_0       | Glycerophospholipids |
| PC aa C38:3 | pc_aa_c38_3       | Glycerophospholipids |
| PC aa C38:4 | pc_aa_c38_4       | Glycerophospholipids |
| PC aa C38:5 | pc_aa_c38_5       | Glycerophospholipids |
| PC aa C38:6 | pc_aa_c38_6       | Glycerophospholipids |
| PC aa C40:1 | pc_aa_c40_1       | Glycerophospholipids |
| PC aa C40:2 | pc_aa_c40_2       | Glycerophospholipids |
| PC aa C40:3 | pc_aa_c40_3       | Glycerophospholipids |
| PC aa C40:4 | pc_aa_c40_4       | Glycerophospholipids |
| PC aa C40:5 | pc_aa_c40_5       | Glycerophospholipids |
| PC aa C40:6 | pc_aa_c40_6       | Glycerophospholipids |
| PC aa c42:0 | pc_aa_c42_0       | Glycerophospholipids |
| PC aa c42:1 | pc_aa_c42_1       | Glycerophospholipids |
| PC aa C42:2 | pc_aa_c42_2       | Glycerophospholipids |
| PC aa C42:4 | pc_aa_c42_4       | Glycerophospholipids |
| PC aa C42:5 | pc_aa_c42_5       | Glycerophospholipids |
| PC aa C42:6 | pc_aa_c42_6       | Glycerophospholipids |
| PC ae C30:0 | pc_ae_c30_0       | Glycerophospholipids |
| PC ae C30:1 | pc_ae_c32_1       | Glycerophospholipids |
| PC ae C30:2 | pc_ae_c32_2       | Glycerophospholipids |
| PC ae C34:0 | pc_ae_c34_0       | Glycerophospholipids |
| PC ae C34:1 | pc_ae_c34_1       | Glycerophospholipids |
| PC ae C34:2 | pc_ae_c34_2       | Glycerophospholipids |
| PC ae C34:3 | pc_ae_c34_3       | Glycerophospholipids |
| PC ae C36:0 | pc_ae_c36_0       | Glycerophospholipids |

**Supplementary Table S1 (continued)**

| Name          | Symbol in Figures | Class                |
|---------------|-------------------|----------------------|
| PC ae C36:1   | pc_ae_c36_1       | Glycerophospholipids |
| PC ae C36:2   | pc_ae_c36_2       | Glycerophospholipids |
| PC ae C36:3   | pc_ae_c36_3       | Glycerophospholipids |
| PC ae C36:4   | pc_ae_c36_4       | Glycerophospholipids |
| PC ae C36:5   | pc_ae_c36_5       | Glycerophospholipids |
| PC ae C38:0   | pc_ae_c38_0       | Glycerophospholipids |
| PC ae C38:2   | pc_ae_c38_2       | Glycerophospholipids |
| PC ae C38:3   | pc_ae_c38_3       | Glycerophospholipids |
| PC ae C38:4   | pc_ae_c38_4       | Glycerophospholipids |
| PC ae C38:5   | pc_ae_c38_5       | Glycerophospholipids |
| PC ae C38:6   | pc_ae_c38_6       | Glycerophospholipids |
| PC ae C40:1   | pc_ae_c40_1       | Glycerophospholipids |
| PC ae C40:2   | pc_ae_c40_2       | Glycerophospholipids |
| PC ae C40:3   | pc_ae_c40_3       | Glycerophospholipids |
| PC ae C40:4   | pc_ae_c40_4       | Glycerophospholipids |
| PC ae C40:5   | pc_ae_c40_5       | Glycerophospholipids |
| PC ae C40:6   | pc_ae_c40_6       | Glycerophospholipids |
| PC ae C42:1   | pc_ae_c42_1       | Glycerophospholipids |
| PC ae C42:2   | pc_ae_c42_2       | Glycerophospholipids |
| PC ae C42:3   | pc_ae_c42_3       | Glycerophospholipids |
| PC ae C42:4   | pc_ae_c42_4       | Glycerophospholipids |
| PC ae C42:5   | pc_ae_c42_5       | Glycerophospholipids |
| PC ae C44:3   | pc_ae_c44_3       | Glycerophospholipids |
| PC ae C44:4   | pc_ae_c44_4       | Glycerophospholipids |
| PC ae C44:5   | pc_ae_c44_5       | Glycerophospholipids |
| PC ae C44:6   | pc_ae_c44_6       | Glycerophospholipids |
| SM C16:0      | sm_c16_0          | Sphingomyelins       |
| SM C16:1      | sm_c16_1          | Sphingomyelins       |
| SM C18:0      | sm_c18_0          | Sphingomyelins       |
| SM C18:1      | sm_c18_1          | Sphingomyelins       |
| SM C20:2      | sm_c20_2          | Sphingomyelins       |
| SM C24:0      | sm_c24_0          | Sphingomyelins       |
| SM C24:1      | sm_c24_1          | Sphingomyelins       |
| SM (OH) C14:1 | sm_oh_c14_1       | Sphingomyelins       |
| SM (OH) C16:1 | sm_oh_c16_1       | Sphingomyelins       |
| SM (OH) C22:1 | sm_oh_c22_1       | Sphingomyelins       |
| SM (OH) C22:2 | sm_oh_c22_2       | Sphingomyelins       |
| SM (OH)C24:1  | sm_oh_c24_1       | Sphingomyelins       |
| Hexoses       | h1                | Monosaccharides      |

**Supplementary Table S2:** Study origin of duplicate samples in the EPIC targeted metabolomics data.

| Study 1 | Study 2 | Number of EPIC participants |
|---------|---------|-----------------------------|
| BREA    | CLRT1   | 1                           |
| BREA    | CLRT2   | 4                           |
| BREA    | ENDO    | 5                           |
| BREA    | GLBD    | 1                           |
| BREA    | LIVE    | 2                           |
| CLRT1   | CLRT2   | 2                           |
| CLRT1   | ENDO    | 2                           |
| CLRT1   | KIDN    | 2                           |
| CLRT1   | LIVE    | 1                           |
| CLRT1   | PROS    | 4                           |
| CLRT2   | ENDO    | 4                           |
| CLRT2   | KIDN    | 5                           |
| CLRT2   | PROS    | 27                          |
| ENDO    | KIDN    | 2                           |
| GLBD    | LIVE    | 51                          |
| GLBD    | PROS    | 1                           |
| KIDN    | LIVE    | 1                           |
| KIDN    | PROS    | 23                          |
| LIVE    | PROS    | 9                           |
